# Supplementary material
Source: MDPI journal article supplement (https://www.mdpi.com/2073-4352/13/7/998)
Supplement: s1 [file s1]

| Distances |                      | (1)        | (2)                | (3)        |                       |            |
|-----------|----------------------|------------|--------------------|------------|-----------------------|------------|
| [Å]       |                      |            |                    |            |                       |            |
| Ti-Ti     | Ti(1)-Ti(3)          | 3.0824(11) | Ti(1)-Ti(3)#1      | 3.1009(9)  | Ti(1)-Ti(2)#1         | 3.1081(11) |
|           | Ti(1)-Ti(2)          | 3.3574(10) | Ti(1)-Ti(2)#1      | 3.1185(9)  | Ti(1)-Ti(3)#1         | 3.1093(12) |
|           |                      |            | Ti(2)-Ti(3)#1      | 3.1156(9)  |                       |            |
| Ti-O      | Ti(1)-O(2)           | 1.755(3)   | Ti(1)-O(71)        | 1.769(3)   | Ti(1)-O(71)           | 1.759(3)   |
|           | Ti(1)-O(1)#1         | 1.902(3)   | Ti(1)-O(3)         | 1.881(3)   | Ti(1)-O(1)            | 1.896(3)   |
|           | Ti(1)-O(51)          | 2.024(3)   | Ti(1)-O(1)         | 1.904(3)   | Ti(1)-O(3)            | 1.899(3)   |
|           | Ti(1)-O(11)          | 2.039(3)   | Ti(1)-O(11)        | 2.035(2)   | Ti(1)-O(11)           | 2.050(3)   |
|           | Ti(1)-O(26)          | 2.044(3)   | Ti(1)-O(32)#1      | 2.071(3)   | Ti(1)-O(32)#1         | 2.066(3)   |
|           | Ti(1)-Ti(2)          | 3.3574(10) | Ti(1)-O(2)#1       | 2.148(3)   | Ti(1)-O(2)#1          | 2.151(3)   |
|           | Ti(2)-O(86)          | 1.751(4)   | Ti(2)-O(91)        | 1.755(3)   | Ti(3)-O(81)           | 1.766(3)   |
|           | Ti(2)-O(2)           | 1.869(2)   | Ti(2)-O(3)         | 1.896(2)   | Ti(3)-O(2)            | 1.887(3)   |
|           | Ti(2)-O(1)           | 1.906(2)   | Ti(2)-O(2)         | 1.916(3)   | Ti(3)-O(1)            | 1.895(3)   |
|           | Ti(2)-O(72)#1        | 2.056(3)   | Ti(2)-O(51)        | 2.046(3)   | Ti(3)-O(12)#1         | 2.069(3)   |
|           | Ti(2)-O(12)          | 2.072(3)   | Ti(2)-O(12)#1      | 2.073(2)   | Ti(3)-O(52)#1         | 2.074(3)   |
|           | Ti(2)-O(32)          | 2.101(3)   | Ti(2)-O(1)#1       | 2.142(3)   | Ti(3)-O(3)#1          | 2.142(3)   |
|           | Ti(3)-O(66)          | 1.786(3)   | Ti(3)-O(81)        | 1.773(3)   | Ti(2)-O(91)           | 1.769(3)   |
|           | Ti(3)-O(46)          | 1.793(3)   | Ti(3)-O(2)         | 1.880(2)   | Ti(2)-O(3)            | 1.886(3)   |
|           | Ti(3)-O(26)          | 1.978(3)   | Ti(3)-O(1)         | 1.899(3)   | Ti(2)-O(2)            | 1.911(3)   |
|           | Ti(3)-O(71)          | 2.017(3)   | Ti(3)-O(31)        | 2.073(3)   | Ti(2)-O(51)           | 2.043(3)   |
|           | Ti(3)-O(1)#1         | 2.066(2)   | Ti(3)-O(52)#1      | 2.081(3)   | Ti(2)-O(31)           | 2.072(3)   |
|           | Ti(3)-O(52)          | 2.157(3)   | Ti(3)-O(3)#1       | 2.172(3)   | Ti(2)-O(1)#1          | 2.144(3)   |
|           |                      |            |                    |            |                       |            |
| Angles    |                      | (1)        | (2)                | (3)        |                       |            |
| [°]       |                      |            |                    |            |                       |            |
| Ti-O-Ti   | Ti(1)#1-O(1)-Ti(2)   | 128.79(13) | O(2)-Ti(1)-O(1)#1  | 104.53(11) | Ti(3)#1-Ti(2)-Ti(1)#1 | 68.84(2)   |
|           | Ti(1)#1-O(1)-Ti(3)#1 | 101.84(11) | O(2)-Ti(1)-O(51)   | 92.97(11)  | Ti(3)-O(1)-Ti(1)      | 135.43(17) |
|           | Ti(2)-O(1)-Ti(3)#1   | 129.36(14) | O(1)#1-Ti(1)-O(51) | 92.98(11)  | Ti(3)-O(1)-Ti(2)#1    | 99.98(13)  |
|           | Ti(1)-O(2)-Ti(2)     | 135.75(14) | O(2)-Ti(1)-O(11)   | 93.65(11)  | Ti(1)-O(1)-Ti(2)#1    | 100.43(13) |
|           |                      |            | O(1)#1-Ti(1)-O(11) | 90.26(11)  | Ti(3)-O(2)-Ti(2)      | 133.69(16) |
|           |                      |            | O(51)-Ti(1)-O(11)  | 171.67(10) | Ti(3)-O(2)-Ti(1)#1    | 100.50(13) |
|           |                      |            | O(2)-Ti(1)-O(26)   | 176.25(12) | Ti(2)-O(2)-Ti(1)#1    | 99.66(13)  |
|           |                      |            | O(1)#1-Ti(1)-O(26) | 79.07(11)  | Ti(2)-O(3)-Ti(1)      | 132.25(16) |
|           |                      |            | O(51)-Ti(1)-O(26)  | 85.78(11)  | Ti(2)-O(3)-Ti(3)#1    | 100.33(13) |
| O-Ti-O    | O(2)-Ti(1)-O(1)#1    | 104.53(11) | O(71)-Ti(1)-O(3)   | 104.95(12) | O(71)-Ti(1)-O(1)      | 100.75(14) |
|           | O(2)-Ti(1)-O(51)     | 92.97(11)  | O(71)-Ti(1)-O(1)   | 100.59(12) | O(71)-Ti(1)-O(3)      | 99.04(14)  |
|           | O(1)#1-Ti(1)-O(51)   | 92.98(11)  | O(3)-Ti(1)-O(1)    | 101.69(11) | O(1)-Ti(1)-O(3)       | 102.74(13) |
|           | O(2)-Ti(1)-O(11)     | 93.65(11)  | O(71)-Ti(1)-O(11)  | 91.56(11)  | O(71)-Ti(1)-O(11)     | 96.10(13)  |

|                    |            |                      |            |                     |            |
|--------------------|------------|----------------------|------------|---------------------|------------|
| O(1)#1-Ti(1)-O(11) | 90.26(11)  | O(3)-Ti(1)-O(11)     | 157.82(12) | O(1)-Ti(1)-O(11)    | 157.46(13) |
| O(51)-Ti(1)-O(11)  | 171.67(10) | O(1)-Ti(1)-O(11)     | 89.40(11)  | O(3)-Ti(1)-O(11)    | 89.17(13)  |
| O(2)-Ti(1)-O(26)   | 176.25(12) | O(71)-Ti(1)-O(32)#1  | 92.51(12)  | O(71)-Ti(1)-O(32)#1 | 95.21(14)  |
| O(1)#1-Ti(1)-O(26) | 79.07(11)  | O(3)-Ti(1)-O(32)#1   | 85.77(11)  | O(1)-Ti(1)-O(32)#1  | 86.55(13)  |
| O(51)-Ti(1)-O(26)  | 85.78(11)  | O(1)-Ti(1)-O(32)#1   | 162.56(11) | O(3)-Ti(1)-O(32)#1  | 161.14(13) |
| O(11)-Ti(1)-O(26)  | 87.30(10)  | O(11)-Ti(1)-O(32)#1  | 78.70(11)  | O(11)-Ti(1)-O(32)#1 | 77.04(13)  |
| O(2)-Ti(1)-O(31)   | 91.76(12)  | O(3)-Ti(1)-O(2)#1    | 78.27(10)  | O(71)-Ti(1)-O(2)#1  | 175.77(14) |
| O(1)#1-Ti(1)-O(31) | 163.58(11) | O(1)-Ti(1)-O(2)#1    | 77.60(11)  | O(1)-Ti(1)-O(2)#1   | 78.00(12)  |
| O(51)-Ti(1)-O(31)  | 88.14(12)  | O(11)-Ti(1)-O(2)#1   | 85.59(10)  | O(3)-Ti(1)-O(2)#1   | 77.41(12)  |
| O(11)-Ti(1)-O(31)  | 86.60(11)  | O(32)#1-Ti(1)-O(2)#1 | 88.71(11)  | O(11)-Ti(1)-O(2)#1  | 86.20(11)  |
| O(26)-Ti(1)-O(31)  | 84.68(11)  |                      |            |                     |            |

---
